# Supplementary material for: Apoptosis Induction in HepG2 and HCT116 Cells by a Novel Quercetin-Zinc (II) Complex: Enhanced Absorption of Quercetin and Zinc (II)
Source: MDPI journal article supplement (doi:10.3390/ijms242417457), 2023-12-14
Supplement: s1 [file s1]

**Table S1.** Elemental analysis data of Zn-Q and Q+Zn

| Complex | C%    |       | H%    |       | Zn%   |       | molecular formula                                               | purity |
|---------|-------|-------|-------|-------|-------|-------|-----------------------------------------------------------------|--------|
|         | calc. | found | calc. | found | calc. | found |                                                                 |        |
| Zn-Q    | 54.0  | 52.5  | 2.60  | 2.79  | 9.8   | 8.2   | C <sub>30</sub> H <sub>17</sub> O <sub>14</sub> Zn              | 97%    |
| Q+Zn    | 39.8  | 43.7  | 3.10  | 2.98  | 21.6  | 7.1   | C <sub>30</sub> H <sub>28</sub> O <sub>20</sub> Zn <sub>3</sub> | ND     |

ND : Not Determined

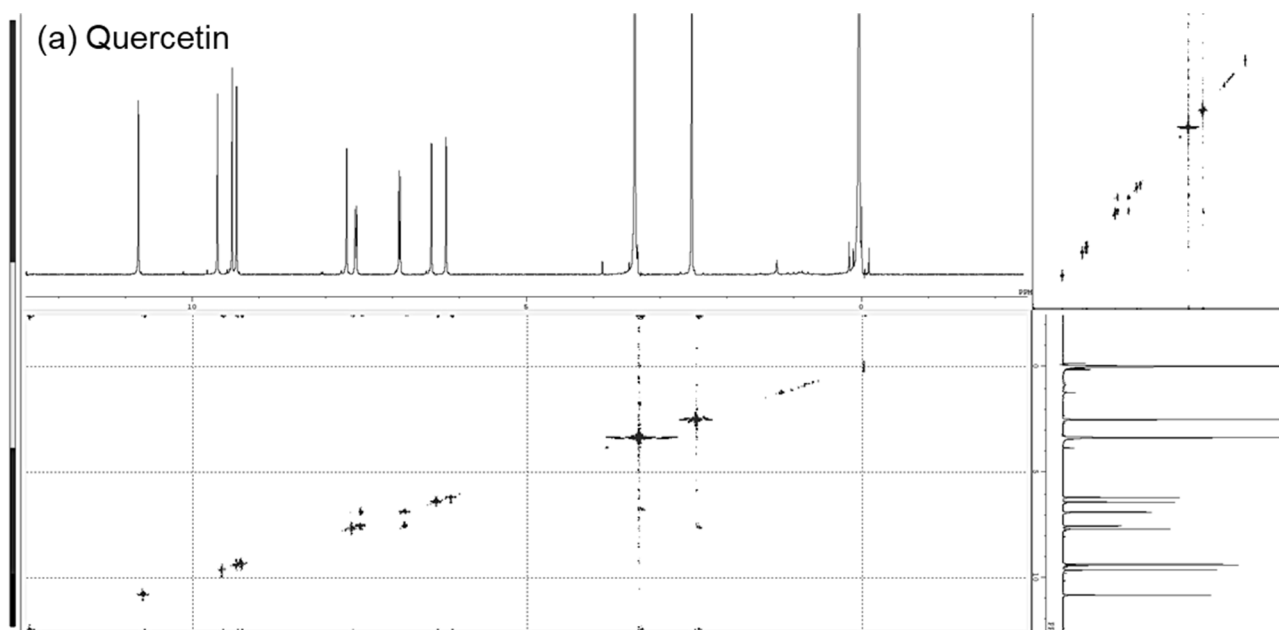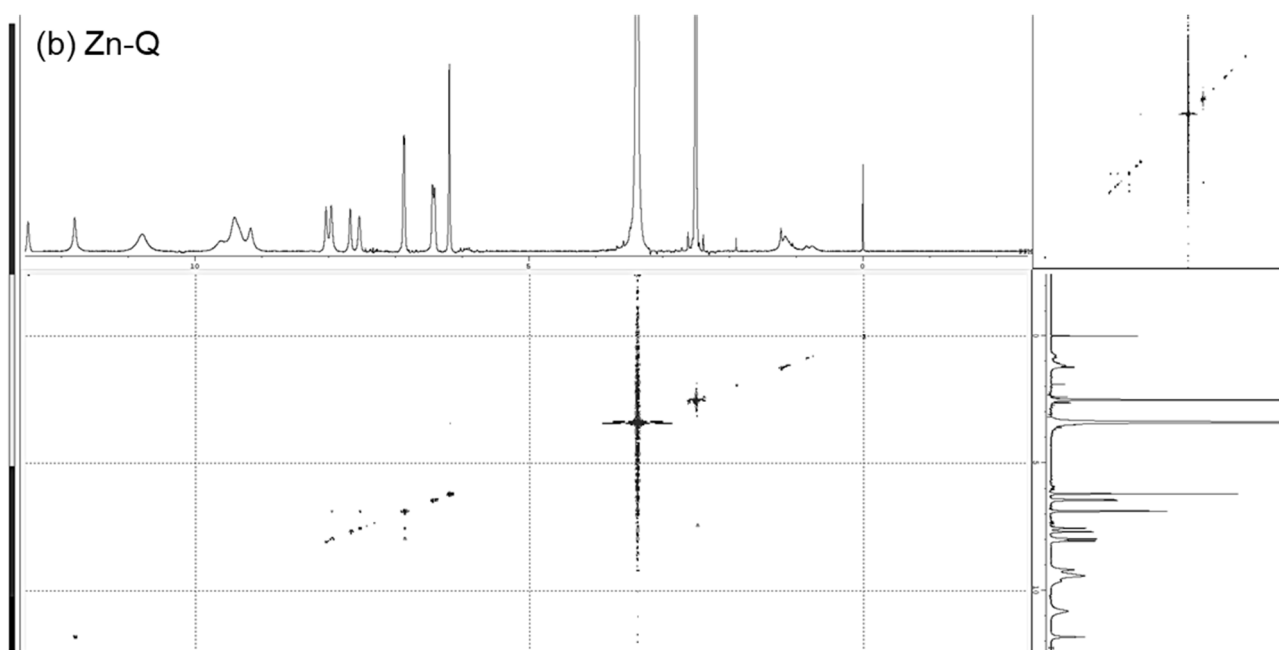

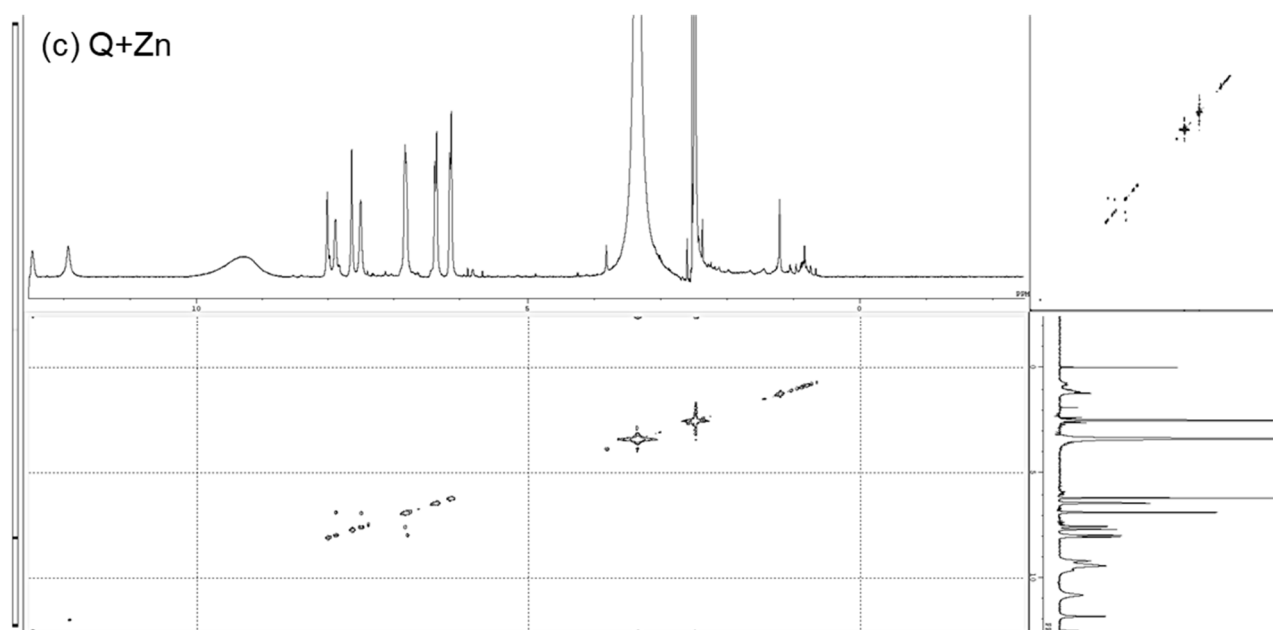

Figure S1: 2D COSY-NMR spectra of Quercetin (a), Zn-Q (b), and Q+Zn (c).

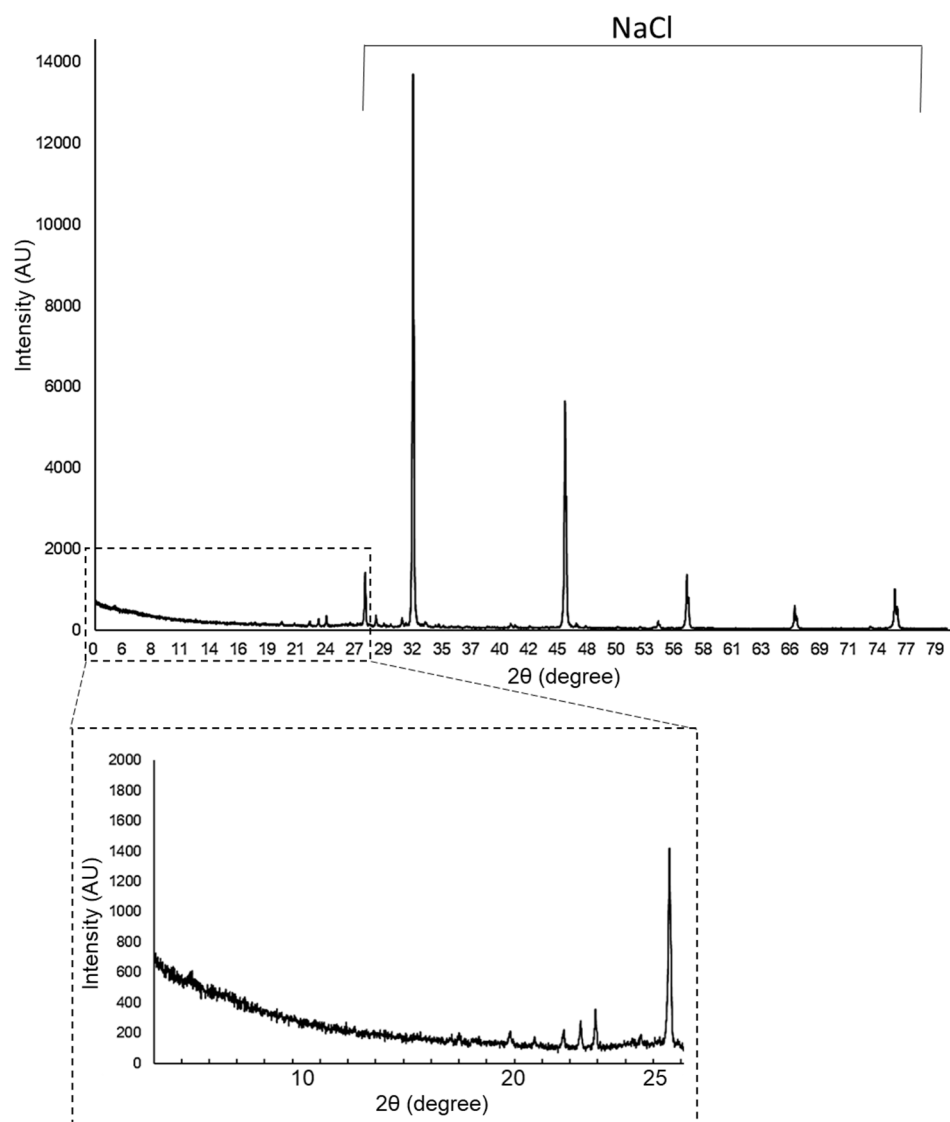

Figure S2: Powder XRD pattern of Q+Zn. The overall crystal structure (top) and the amorphous structure shown by the magnified image in the  $2\theta$  range  $3^\circ$  to  $40^\circ$  (bottom). The diffraction angles  $2\theta$  of  $31^\circ$ ,  $45^\circ$ ,  $56^\circ$ ,  $66^\circ$ , and  $75^\circ$  indicated characteristic peaks of the NaCl crystal structure.
